# Supplementary material for: Feed Supplemented with Aronia melanocarpa (AM) Relieves the Oxidative Stress Caused by Ovulation in Peak Laying Hens and Increases the Content of Yolk Precursors
Source: MDPI journal article supplement (doi:10.3390/ani12243574), 2022-12-17
Supplement: s1 [file s1]

**Supplementary Table:**

**Table S1.** Composition and nutrient levels of diets.

| Item, %                             | control | VC     | 1%AM   | 4%AM   | 7%AM   |
|-------------------------------------|---------|--------|--------|--------|--------|
| Corn                                | 63.150  | 63.150 | 61.930 | 58.190 | 54.490 |
| Soybean meal                        | 25.700  | 25.700 | 25.860 | 26.330 | 26.800 |
| Stone powder                        | 8.930   | 8.930  | 8.930  | 8.930  | 8.930  |
| Steamed bone meal                   | 0.700   | 0.700  | 0.700  | 0.700  | 0.700  |
| Soybean oil                         | 0.750   | 0.750  | 0.810  | 1.080  | 1.310  |
| Salt                                | 0.300   | 0.300  | 0.300  | 0.300  | 0.300  |
| Choline chloride                    | 0.100   | 0.100  | 0.100  | 0.100  | 0.100  |
| Vitamin–mineral premix <sup>a</sup> | 1.000   | 1.000  | 1.000  | 1.000  | 1.000  |
| Methionine                          | 0.120   | 0.120  | 0.120  | 0.120  | 0.120  |
| Lysine                              | 0.100   | 0.100  | 0.100  | 0.100  | 0.100  |
| Vitamin C                           |         | 0.05   |        |        |        |
| <i>Aronia melanocarpa</i>           |         |        | 1      | 4      | 7      |
| Total                               | 100.85  | 100.90 | 100.85 | 100.85 | 100.85 |
| Nutrient level, %                   |         |        |        |        |        |
| Metabolizable energy<br>(MC/Kg)     | 11.30   | 11.30  | 11.30  | 11.30  | 11.30  |
| Crude protein                       | 17.40   | 17.40  | 17.40  | 17.40  | 17.40  |
| Ca                                  | 3.36    | 3.36   | 3.36   | 3.36   | 3.36   |
| Lys                                 | 0.95    | 0.95   | 0.95   | 0.95   | 0.95   |
| Met                                 | 0.39    | 0.39   | 0.39   | 0.39   | 0.39   |
| Met+Cys                             | 0.30    | 0.30   | 0.30   | 0.30   | 0.30   |
| Crude fiber                         | 2.55    | 2.55   | 2.58   | 2.68   | 2.78   |
| Available phosphorus                | 0.10    | 0.10   | 0.10   | 0.10   | 0.10   |
| NaCl                                | 0.29    | 0.29   | 0.29   | 0.29   | 0.29   |

Trace elements and vitamin are provided by the Mingqian Green Layer Breeding Professional Cooperative in Liaoyuan City, Jilin Province.

Note: The nutrient content in feed formulation is theoretical calculation values.

<sup>a</sup> Vitamin-mineral premix provide (per kg diet): 25,300 IU vitamin A, 7,000 IU vitamin D 3, 270 IU vitamin E, 45 mg vitamin K3, 32 mg vitamin B1, 110 mg vitamin B2, 30 mg vitamin B6, 0.6 mg vitamin B12, 40 mg niacin, 13 mg pantothenic acid, 13 mg folic acid, 0.8 mg biotin, 100 mg choline chloride, 60 mg Fe, 1.4 mg Cu, 60 mg Mn, 13 mg Zn, 0.012 mg Se, 0.098 mg I.

**Table S2.** Primer sequences of genes selected for analysis by RT-qPCR

| Target gene    | Accession number | Primer sequence (5'–3')                                                | Product size |
|----------------|------------------|------------------------------------------------------------------------|--------------|
| $\beta$ -actin | NM_205518.1      | Forward: AACCGGACTGTTACCAACACC<br>Reverse: AGACTGCTGCTGACACCTTCAC      | 156bp        |
| Keap1          | XM_025145847.1   | Forward: AGCAGCGTGAGAGGTGAGTATG<br>Reverse: GCGTACAGCAGTCGGTTCAG       | 113bp        |
| Nrf2           | NM_205117.1      | Forward: GGGACGGTGACACAGGAACAAC<br>Reverse: GCTCTCCACAGCGGAAATCAG      | 97bp         |
| HO-1           | NM_205344.1      | Forward: GCTGGGAAGGAGAGTGAGAGGAC<br>Reverse: GCGACTGTGGTGGCGATGAAG     | 107bp        |
| SOD1           | NM_205064.1      | Forward: TCTTACCGGACCACACTGCATC<br>Reverse: ACGAGGTCCAGCATTCCAGTTA     | 115bp        |
| apoB           | NM_001044633.1   | Forward: ACACTTCGGGCTATTGGA<br>Reverse: TGCCTGTATGGCTGCTTT             | 129bp        |
| apoVLDLII      | NM_205483.2      | Forward: AGCAGGACAGCAGGTCTCTTGG<br>Reverse: TCAGGGACAGTGGTGCTAAGGAG    | 114bp        |
| VTGII          | NM_001031276.1   | Forward: TTCGAAGCTGATGAACACACAC<br>Reverse: GATTGCTTCATCTGCCAGGTC      | 192bp        |
| VLDLR          | NM_205229.1      | Forward: GTGCGGCTCAGGTGAATGTATCC<br>Reverse: GGTCCGAGAAGGGCAGTTGATTTTC | 97bp         |
| ER-a           | NM_205183.2      | Forward: TAGTCCGCTCTACGACCTCTT<br>Reverse: AGTTGGTTTCGGTTCTCCTCTT      | 106bp        |
